# Supplementary material for: Incorporation of tin affects crystallization, morphology, and crystal composition of Sn-Beta
Source: Royal Society of Chemistry journal article supplement (doi:10.1039/c4ta05119j), 2014-01-01

## SUPPORTING INFORMATION

# Incorporation of Tin affects Crystallization, Morphology and Crystal Composition of Sn-Beta

Søren Tolborg,<sup>§,†</sup> Anna Katarinopoulou,<sup>§</sup> Derek Falcone,<sup>‡</sup> Irantzu Sádaba,<sup>§</sup> Christian M. Osmundsen,<sup>§</sup> Robert J. Davis,<sup>‡</sup> Esben Taarning,<sup>\*,§</sup> Peter Fristrup,<sup>†</sup> and Martin S. Holm.<sup>§</sup>

<sup>§</sup> Haldor Topsøe A/S, New Business R&D, Nymøllevej 55, 2800-Kgs. Lyngby, Denmark

<sup>†</sup> Technical University of Denmark, Department of Chemistry, Kemitorvet, 2800-Kgs. Lyngby, Denmark

<sup>‡</sup> University of Virginia, Department of Chemistry, McCormick Road, 400319-Charlottesville, VA, USA

\* Corresponding author. E-mail: esta@topsoe.dk

**Table S1. Physical properties of Sn-Beta samples.**

| Entry | Nominal Si/Sn | Crystallization<br>days | Crystallinity <sup>a</sup><br>% | Tin <sup>b</sup><br>wt % | Si/Sn <sup>b</sup> | S <sub>BET</sub> <sup>c</sup><br>m <sup>2</sup> /g | V <sub>micropore</sub> <sup>d</sup><br>mL/g | ML yield <sup>e</sup><br>% |
|-------|---------------|-------------------------|---------------------------------|--------------------------|--------------------|----------------------------------------------------|---------------------------------------------|----------------------------|
| 1     | -             | 2                       | 72                              | -                        | -                  | 451                                                | 0.16                                        | -                          |
| 2     | -             | 3                       | >95                             | -                        | -                  | 428                                                | 0.18                                        | -                          |
| 3     | -             | 4                       | >95                             | -                        | -                  | 459                                                | 0.19                                        | 0.53 ± 0.02                |
| 4     | -             | 7                       | >95                             | -                        | -                  | 465                                                | 0.20                                        | -                          |
| 5     | -             | 14                      | >95                             | -                        | -                  | 483                                                | 0.20                                        | -                          |
| 6     | -             | 30                      | >95                             | -                        | -                  | 474                                                | 0.19                                        | 1.6 ± 0.1                  |
| 7     | 400           | 2                       | 40                              | 0.46                     | 433                | 429                                                | 0.14                                        | 3.6 ± 2.1                  |
| 8     | 400           | 3                       | >95                             | 0.42                     | 475                | 490                                                | 0.20                                        | -                          |
| 9     | 400           | 4                       | >95                             | 0.42                     | 475                | 464                                                | 0.19                                        | 10.7 ± 0.9                 |
| 10    | 400           | 7                       | >95                             | 0.44                     | 452                | 476                                                | 0.20                                        | 10.0 ± 1.8                 |
| 11    | 400           | 14                      | >95                             | 0.50                     | 396                | 465                                                | 0.20                                        | 12.7 ± 2.8                 |
| 12    | 400           | 30                      | >95                             | 0.49                     | 400                | 482                                                | 0.19                                        | 8.0 ± 1.1                  |
| 13    | 200           | 2                       | 8                               | 0.93                     | 211                | 395                                                | 0.10                                        | 2.3 ± 1.4                  |
| 14    | 200           | 4                       | 52                              | 0.90                     | 219                | 422                                                | 0.14                                        | 4.8 ± 0.8                  |
| 15    | 200           | 5                       | 60                              | 0.91                     | 217                | 437                                                | 0.16                                        | -                          |
| 16    | 200           | 7                       | >95                             | 0.97                     | 203                | 471                                                | 0.19                                        | 22.8 ± 3.0                 |
| 17    | 200           | 14                      | >95                             | 0.96                     | 204                | 473                                                | 0.19                                        | 28.5 ± 4.2                 |
| 18    | 200           | 30                      | >95                             | 0.94                     | 209                | 475                                                | 0.20                                        | 17.8 ± 4.2                 |
| 19    | 150           | 2                       | 20                              | 1.27                     | 154                | 470                                                | 0.14                                        | 1.4 ± 0.2                  |
| 20    | 150           | 4                       | 22                              | 1.16                     | 169                | 387                                                | 0.11                                        | 2.0 ± 0.3                  |
| 21    | 150           | 5                       | 35                              | 1.21                     | 161                | 454                                                | 0.14                                        | 1.9 ± 0.3                  |
| 22    | 150           | 7                       | 63                              | 1.21                     | 161                | 486                                                | 0.18                                        | 3.5 ± 0.5                  |
| 23    | 150           | 10                      | 83                              | 1.19                     | 164                | -                                                  | -                                           | 3.7 ± 0.6                  |
| 24    | 150           | 14                      | >95                             | 1.24                     | 158                | 470                                                | 0.20                                        | 22.1 ± 3.7                 |
| 25    | 150           | 30                      | >95                             | 1.14                     | 172                | 471                                                | 0.19                                        | 25.2 ± 3.8                 |
| 26    | 100           | 7                       | 0                               | 1.77                     | 110                | 421                                                | 0.12                                        | 3.6 ± 1.7                  |
| 27    | 100           | 14                      | 16                              | 1.86                     | 105                | 395                                                | 0.11                                        | 3.9 ± 1.7                  |
| 28    | 100           | 30                      | 36                              | 1.81                     | 107                | 392                                                | 0.13                                        | 5.8 ± 1.5                  |
| 29    | 100           | 60                      | >95                             | 1.81                     | 107                | 508                                                | 0.20                                        | 31.9 ± 5.3                 |

a. Determined by Rietveld refinement of XRD measurements using the PONCKS method.

b. Determined by ICP analysis.

c. BET surface area

d. Micropore volume, calculated using the *t*-plot method.

e. Average ML yield of min. 3 catalytic runs. Conditions: 25 mg catalyst, 300 mg DHA, 6.5 mL methanol, 600 rpm, 75°C, 2 hours

**Table S2. Physical properties of Sn-Beta samples prepared using different tin sources, crystallized for 14 days.**

| Entry | Tin source                                                                                   | Nominal Si/Sn | Tin <sup>a</sup><br>wt % | Si/Sn <sup>a</sup> | S <sub>BET</sub> <sup>b</sup><br>m <sup>2</sup> /g | V <sub>micropore</sub> <sup>c</sup><br>mL/g | ML yield <sup>d</sup><br>% |
|-------|----------------------------------------------------------------------------------------------|---------------|--------------------------|--------------------|----------------------------------------------------|---------------------------------------------|----------------------------|
| 1     | Sn(CH <sub>3</sub> CO <sub>2</sub> ) <sub>4</sub>                                            | 150           | 0.67                     | 295                | 468                                                | 0.18                                        | 27.4 ± 0.8                 |
| 2     | ((C <sub>2</sub> H <sub>5</sub> ) <sub>4</sub> N) <sub>2</sub> SnF <sub>6</sub> <sup>b</sup> | 150           | 1.19                     | 165                | 478                                                | 0.19                                        | 13.3 ± 0.3                 |
| 3     | SnO <sub>2</sub> <sup>c</sup>                                                                | 150           | 1.11                     | 177                | 456                                                | 0.19                                        | 4.0 ± 0.4                  |

a. Determined by ICP analysis.

b. BET surface area

c. Micropore volume, calculated using the *t*-plot method.

d. Average ML yield of min. 3 catalytic runs. Conditions: 25 mg catalyst, 300 mg DHA, 6.5 mL methanol, 600 rpm, 75°C, 2 hours

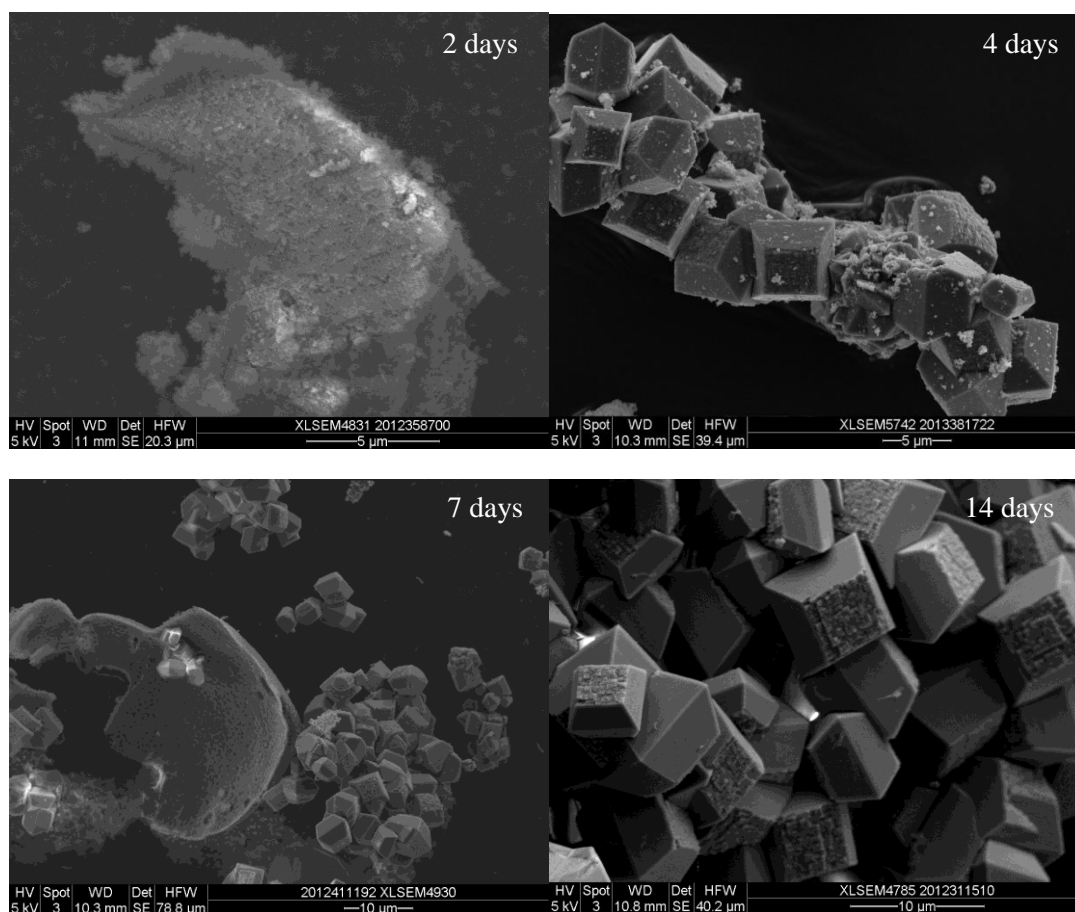

Figure S1. Micrographs of Sn-Beta sample with Si/Sn = 200 amorphous (2 days), 'semi-amorphous' (4 days) and crystalline (7, 14 days)

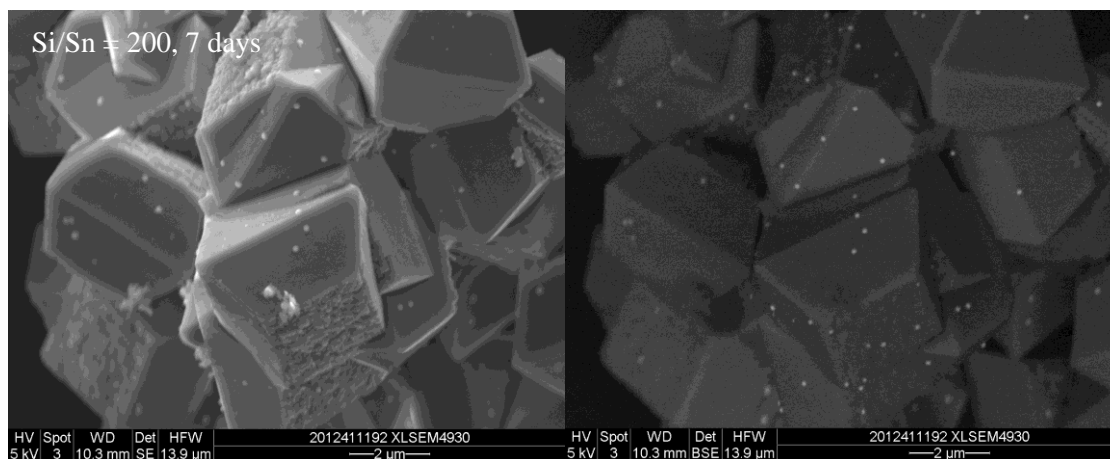

Figure S2. Secondary electron (left) and back-scattered electron (right) image of Sn-Beta (Si/Sn = 200) synthesized for 7 days with SnO<sub>2</sub> particles visible on the surface

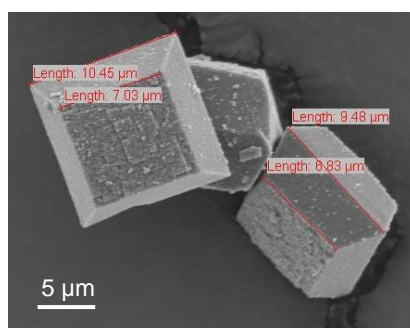

Figure S3. SEM image of Sn-Beta sample with Si/Sn = 150 synthesized for 14 days with measurements of *a* and *b*.

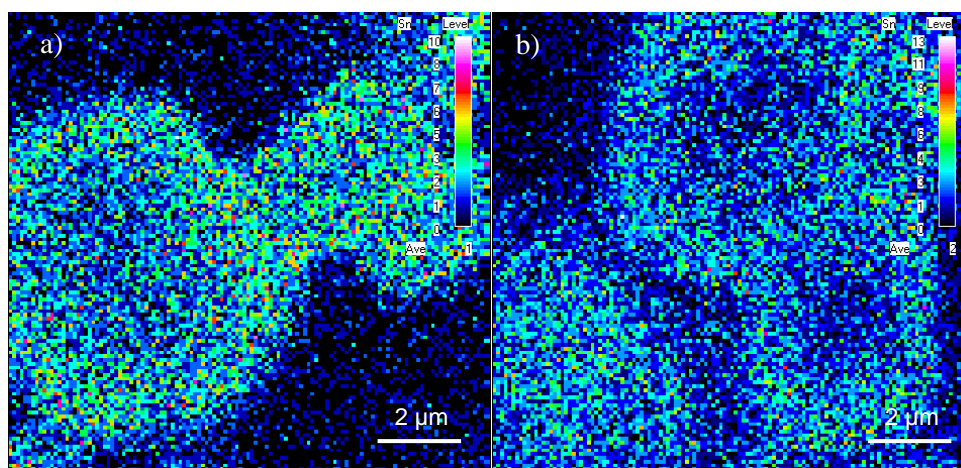

Figure S4. SEM-WDS measurements showing the tin distribution in transverse sections of Sn-Beta zeolite (Si/Sn = 200, synthesized for 7 days). The measurements are done a) before and b) after thermal removal of the organic template at 550°C for 6 hours.

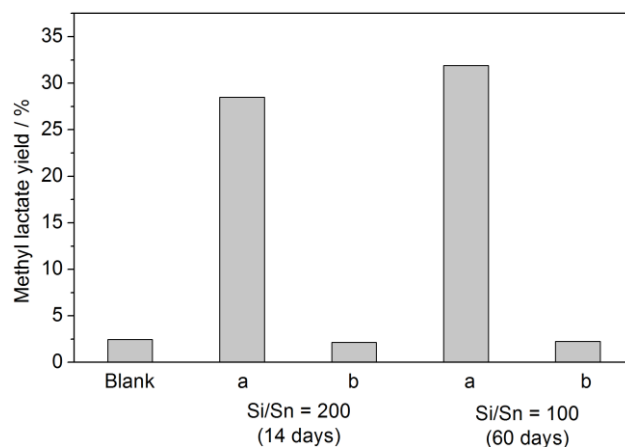

Figure S5. Comparison of the conversion of 1,3-dihydroxyacetone performed using a) the Sn-Beta catalyst and b) Leaching experiment: initially treating the Sn-Beta zeolite in 6.5 mL of methanol at 75°C for 2 hours, filtering off the catalyst and using this methanol as the solvent for the reaction. Reaction conditions: 25 mg catalyst, 300 mg DHA, 6.5 mL methanol, 600 rpm, 75°C, 2 hours.

Additional SE images of samples presented in Table S1.

No tin, 2 days (Table S1, entry 1)

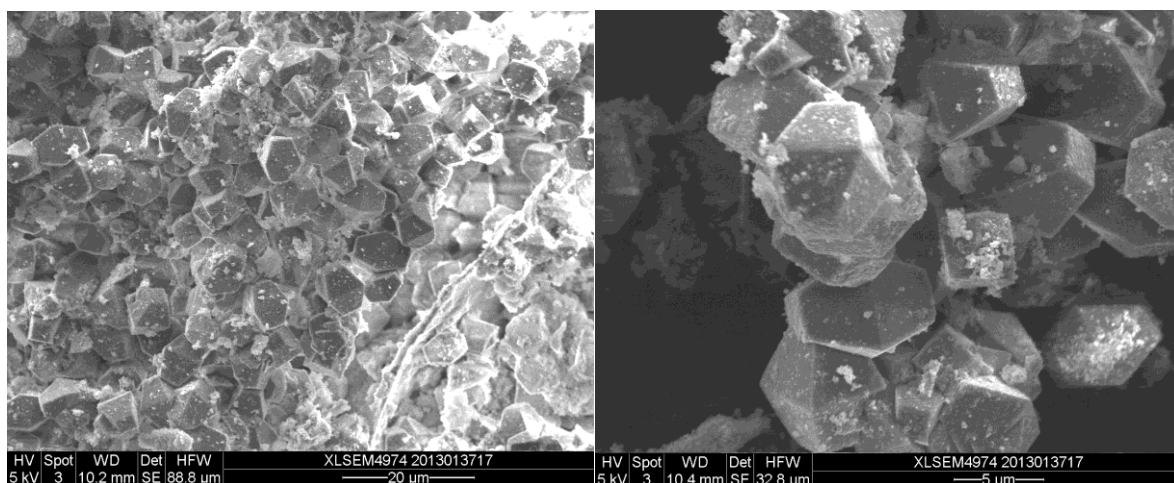

No tin, 4 days (Table S1, entry 3)

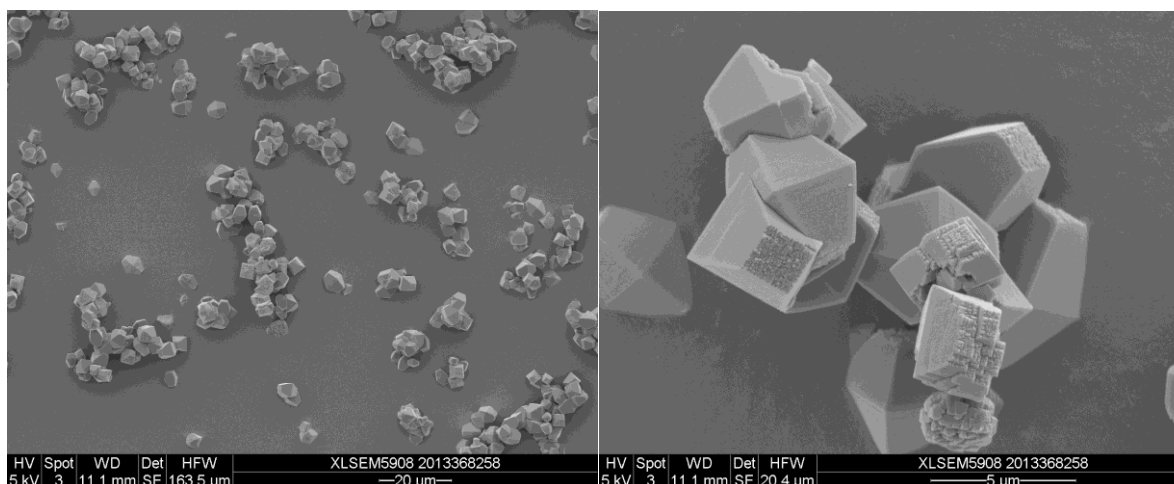

No tin, 7 days (Table S1, entry 4)

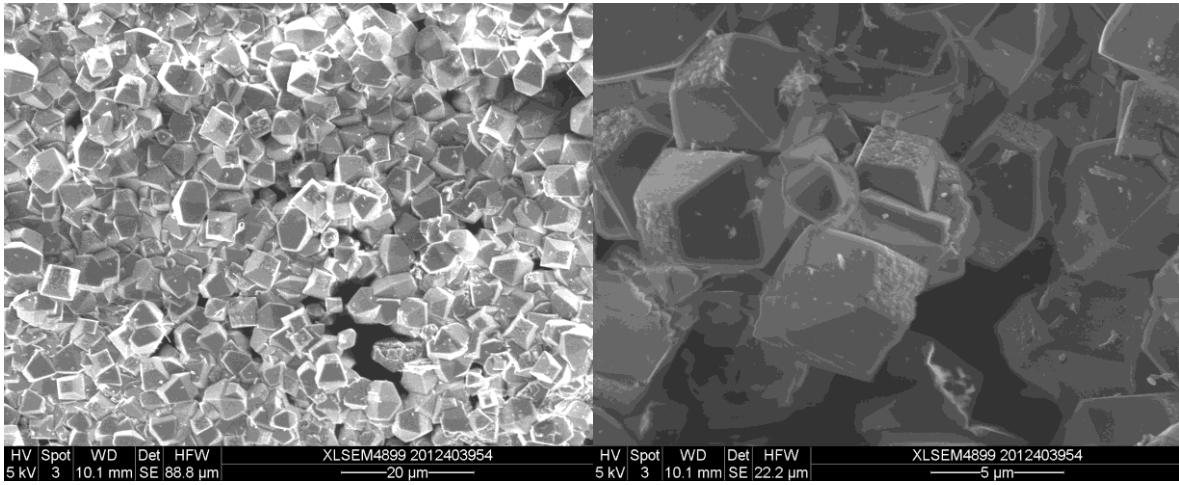

No tin, 14 days (Table S1, entry 5)

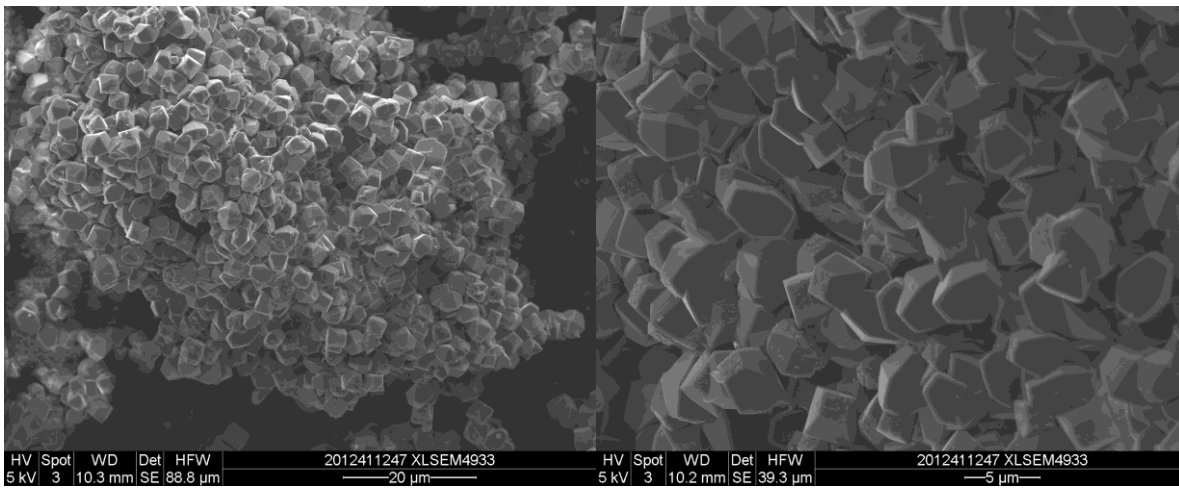

No tin, 30 days (Table S1, entry 6)

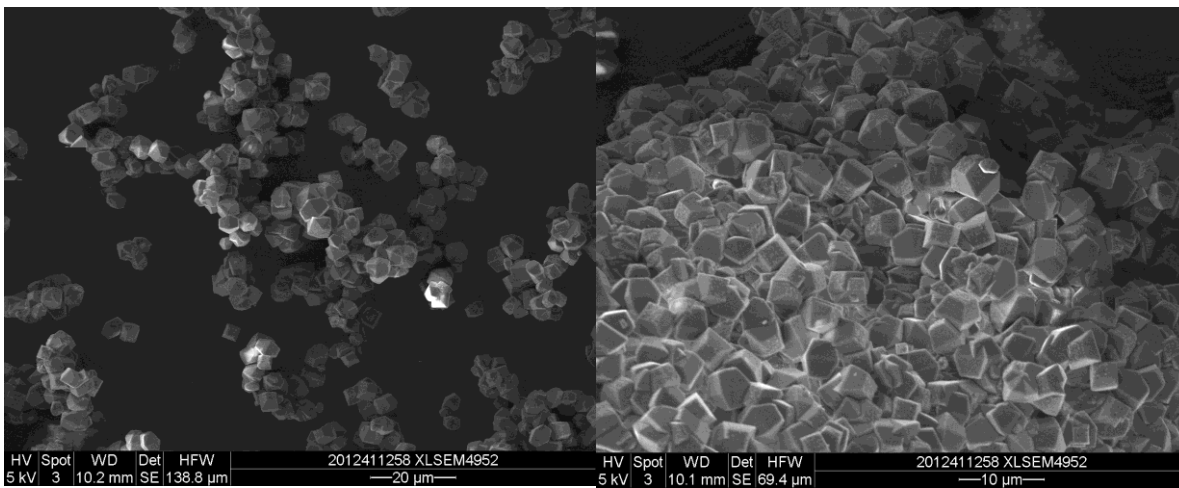

Si/Sn = 400, 2 days (Table S1, entry 7)

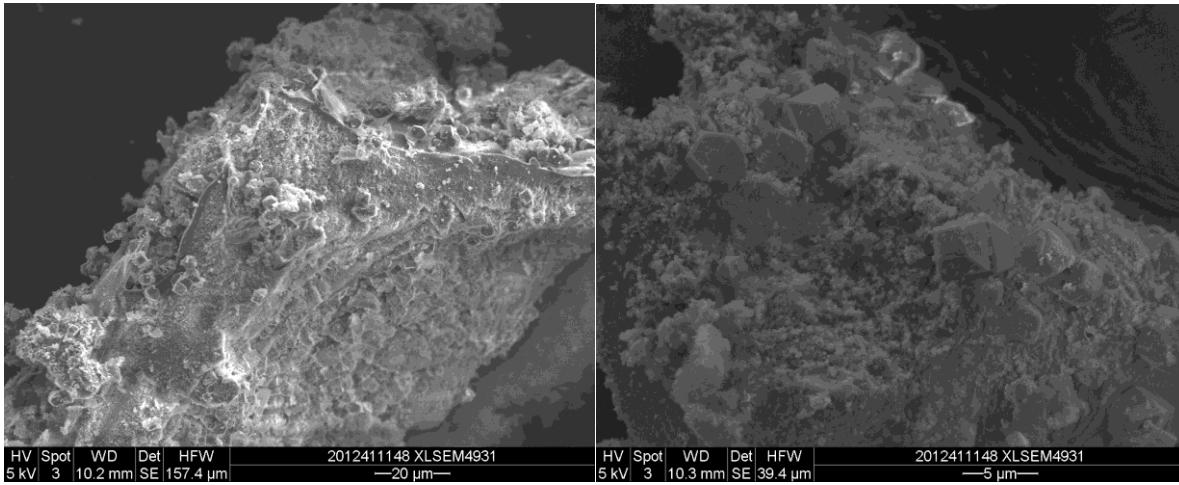

Si/Sn = 400, 4 days (Table S1, entry 9)

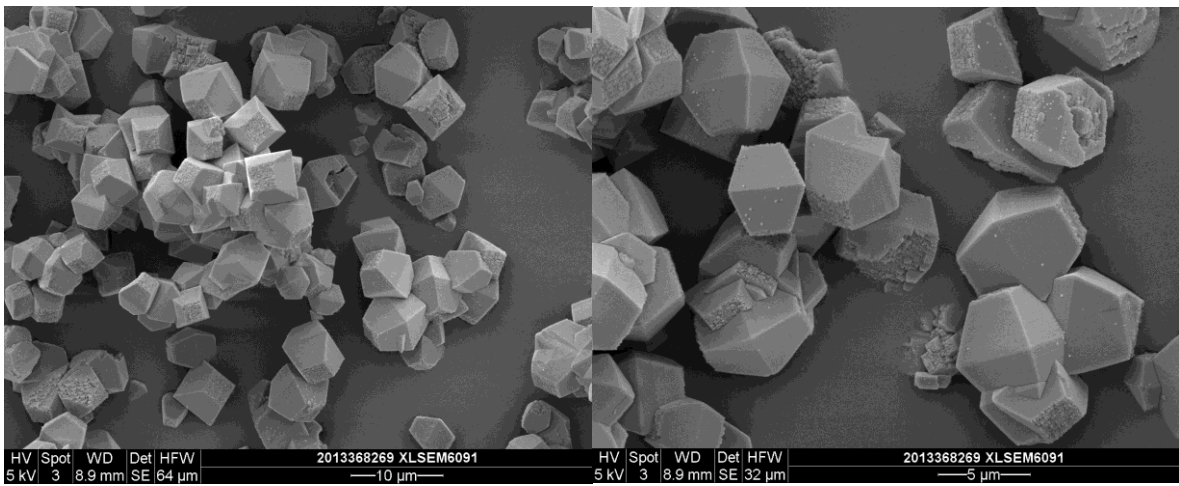

Si/Sn = 400, 7 days (Table S1, entry 10)

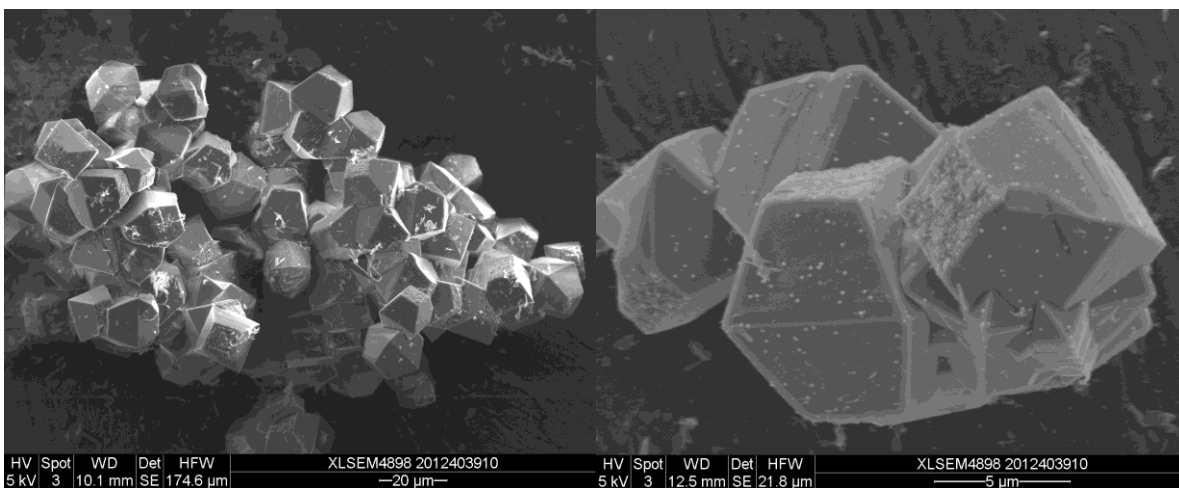

Si/Sn = 400, 14 days (Table S1, entry 11)

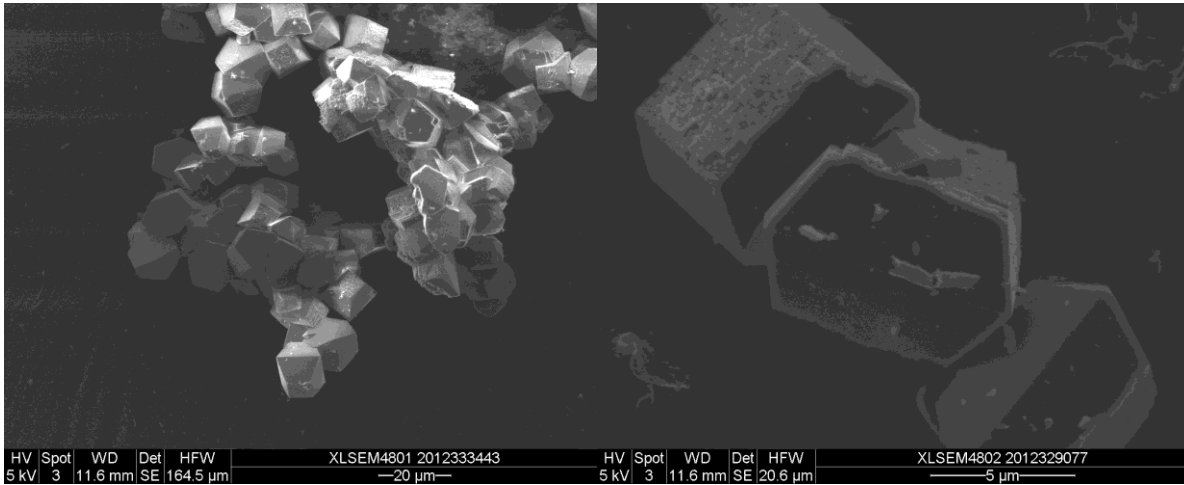

Si/Sn = 400, 30 days (Table S1, entry 12)

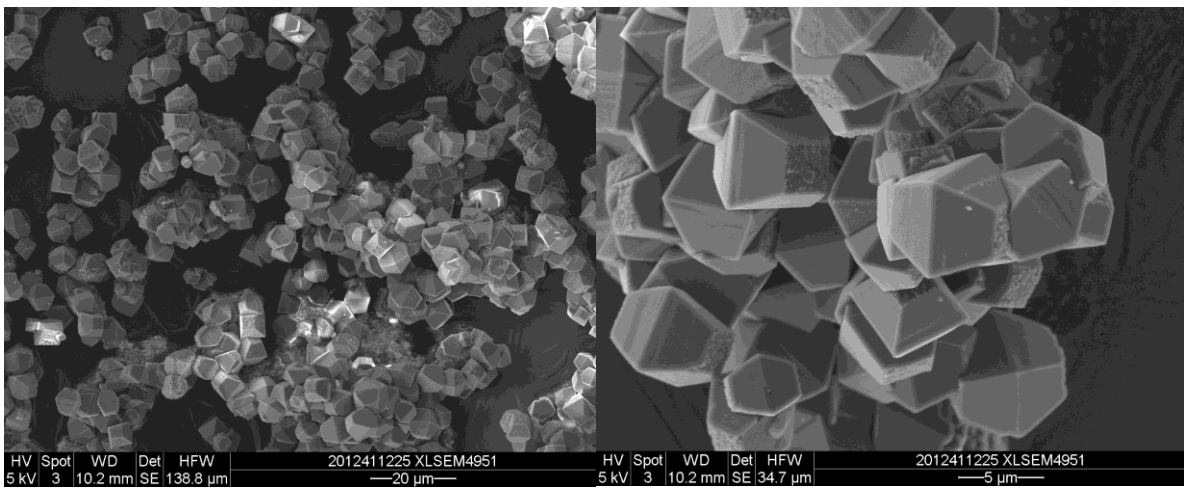

Si/Sn = 200, 2 days (Table S1, entry 13)

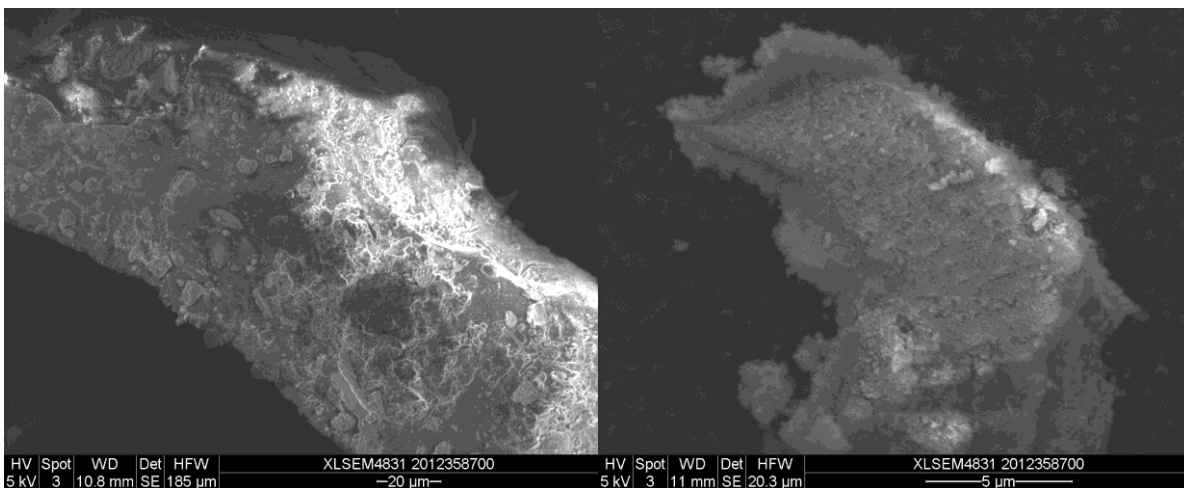



Si/Sn = 200, 4 days (Table S1, entry 14)

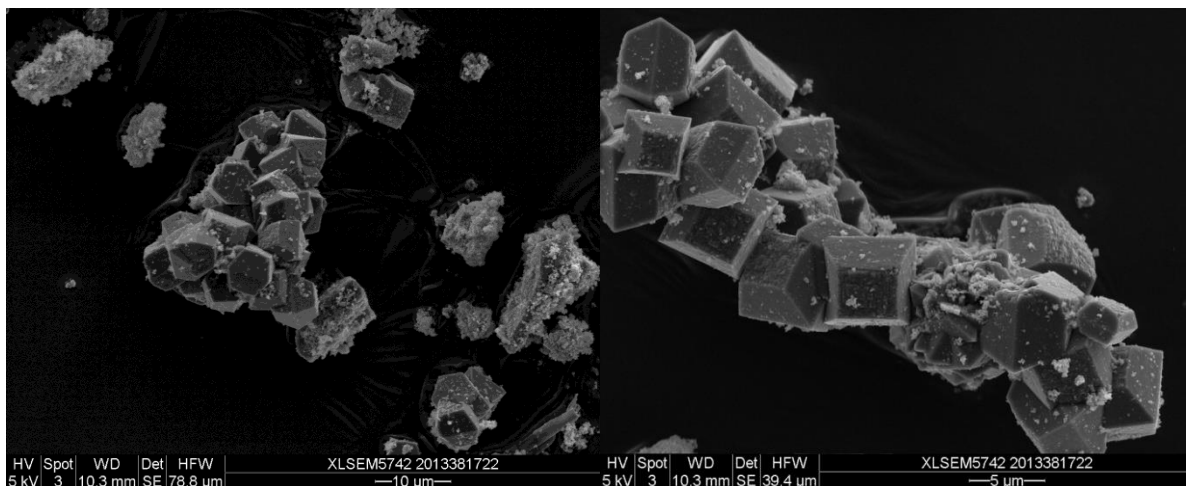

Si/Sn = 200, 5 days (Table S1, entry 15)

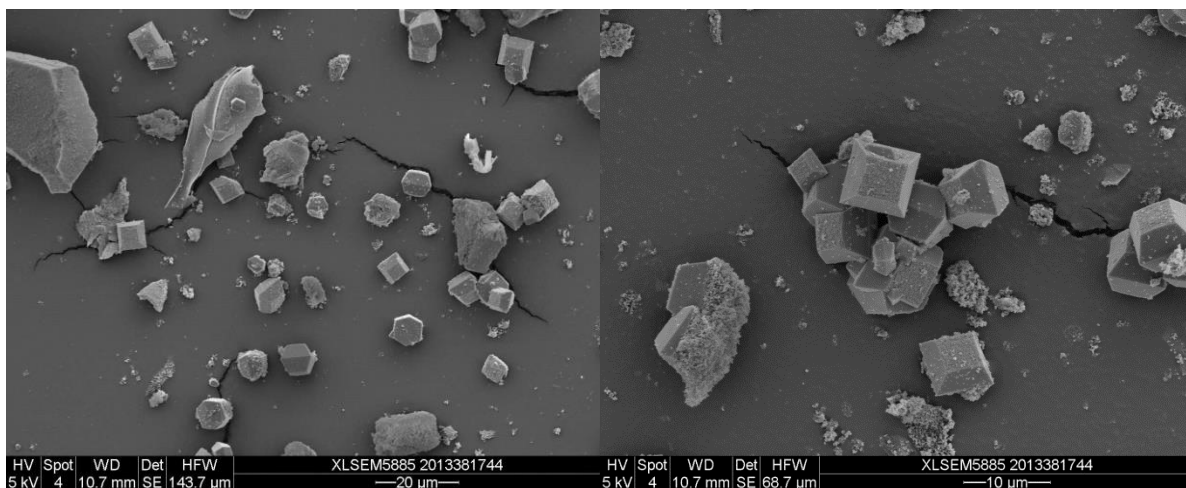

Si/Sn = 200, 7 days (Table S1, entry 17)

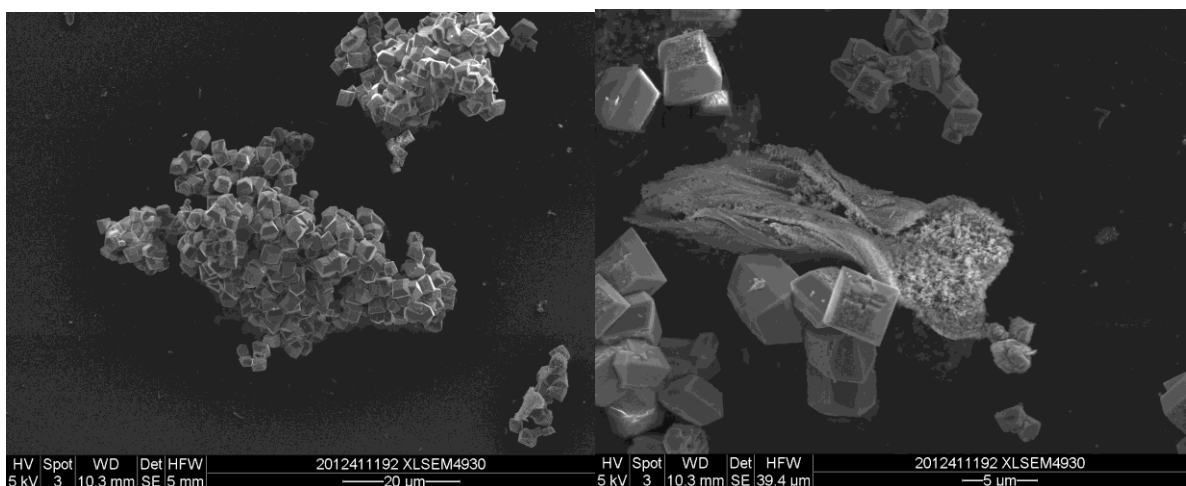

Si/Sn = 200, 14 days (Table S1, entry 17)

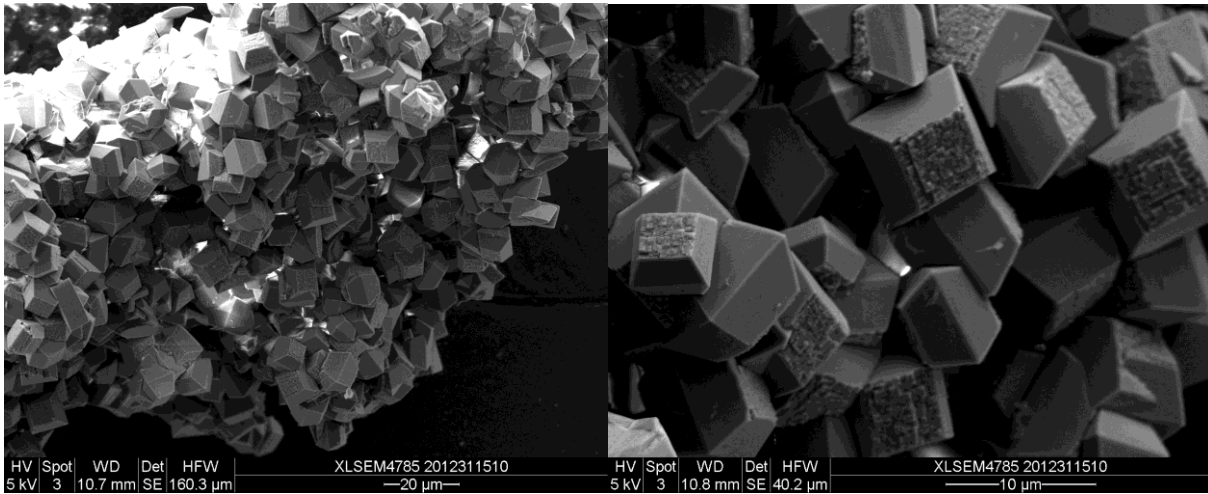

Si/Sn = 200, 30 days (Table S1, entry 18)

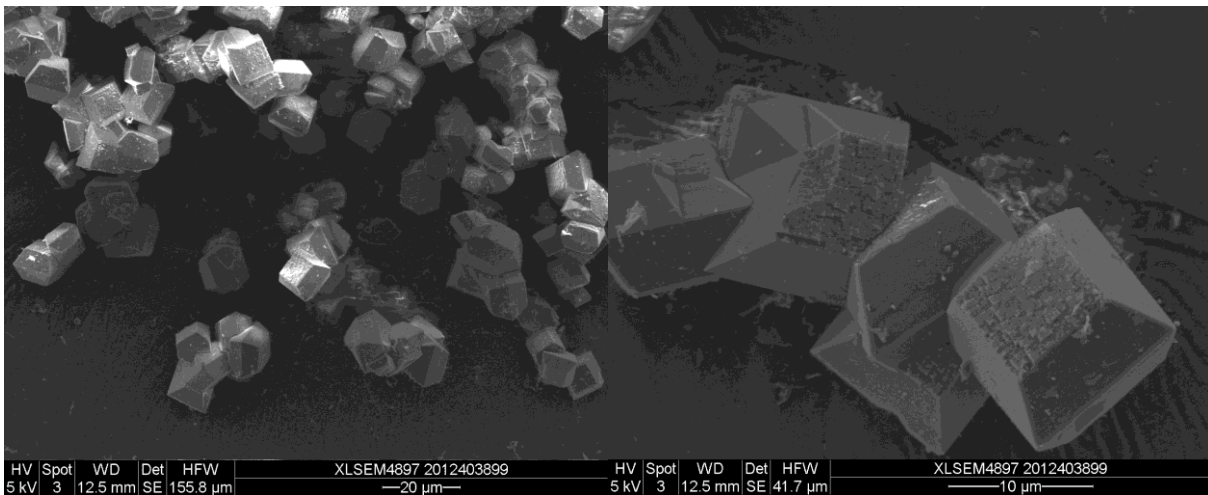

Si/Sn = 150, 2 days (Table S1, entry 19)

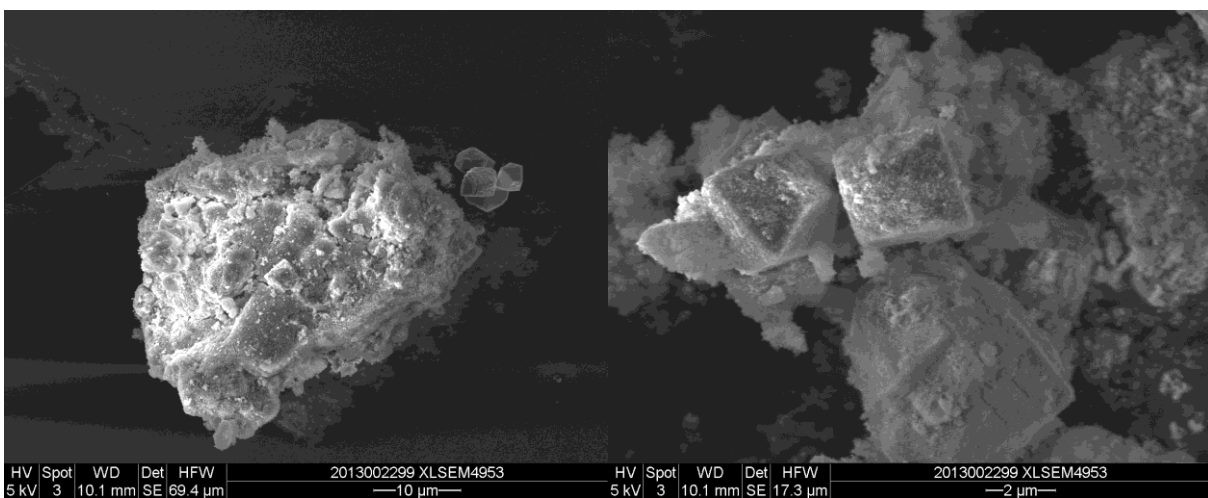

Si/Sn = 150, 4 days (Table S1, entry 20)

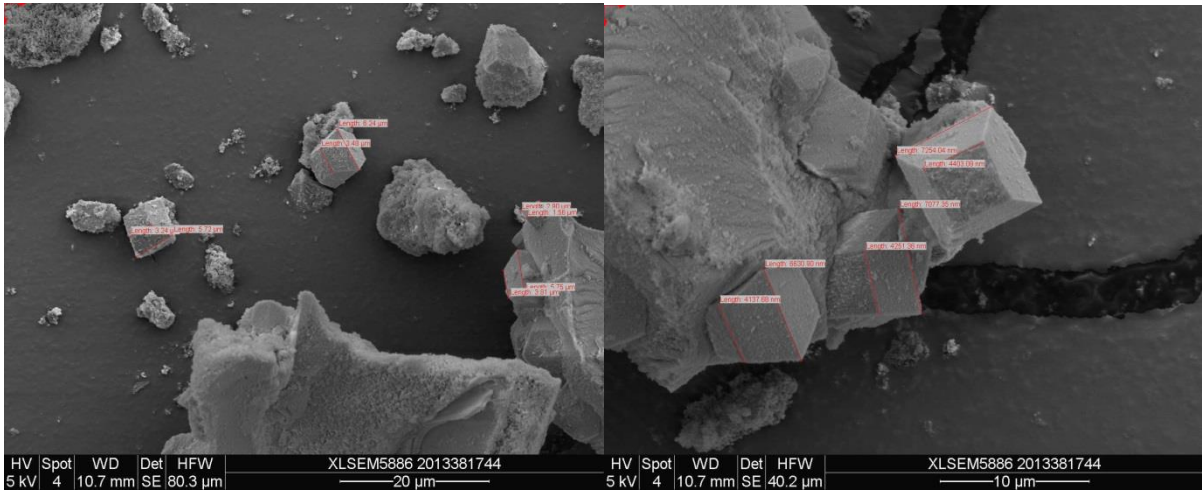

Si/Sn = 150, 5 days (Table S1, entry 21)

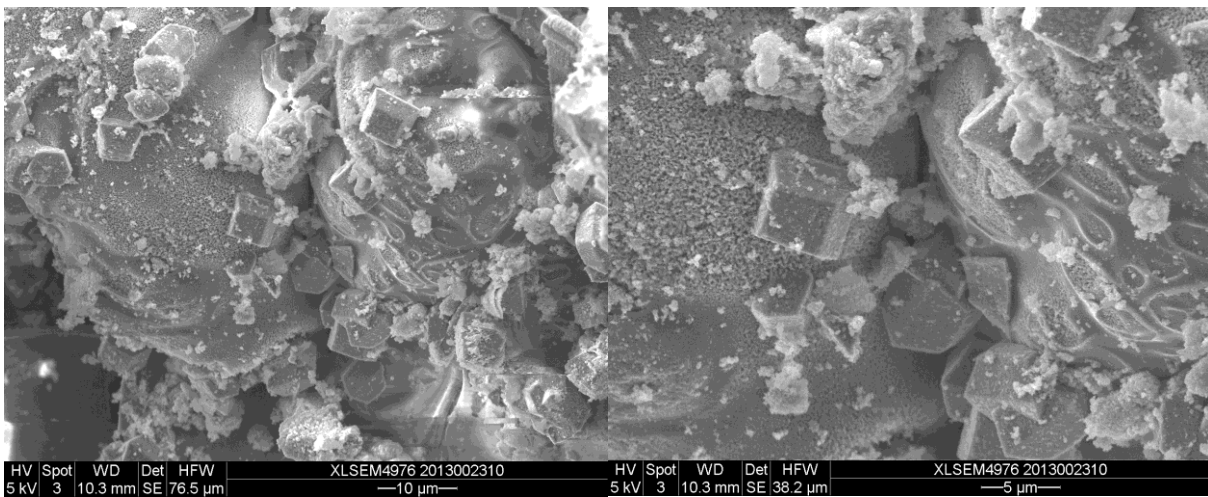

Si/Sn = 150, 7 days (Table S1, entry 22)

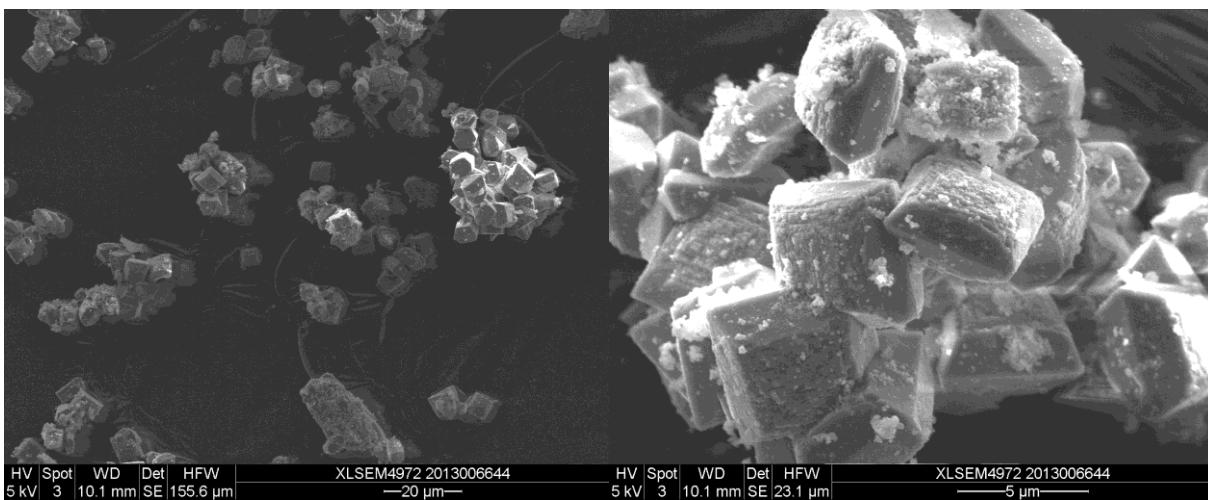

Si/Sn = 150, 14 days (Table S1, entry 24)

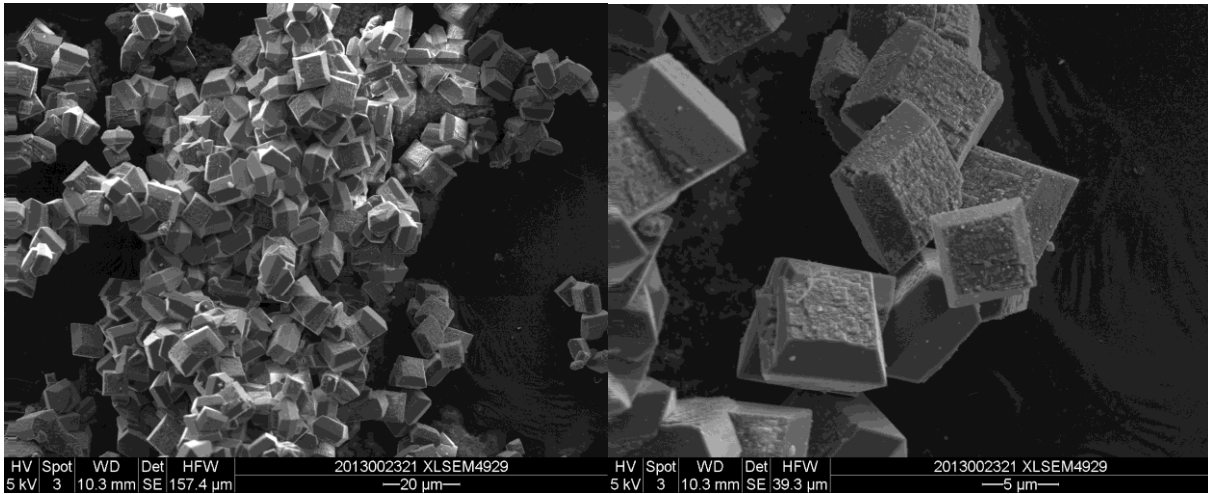

Si/Sn = 150, 30 days (Table S1, entry 25)

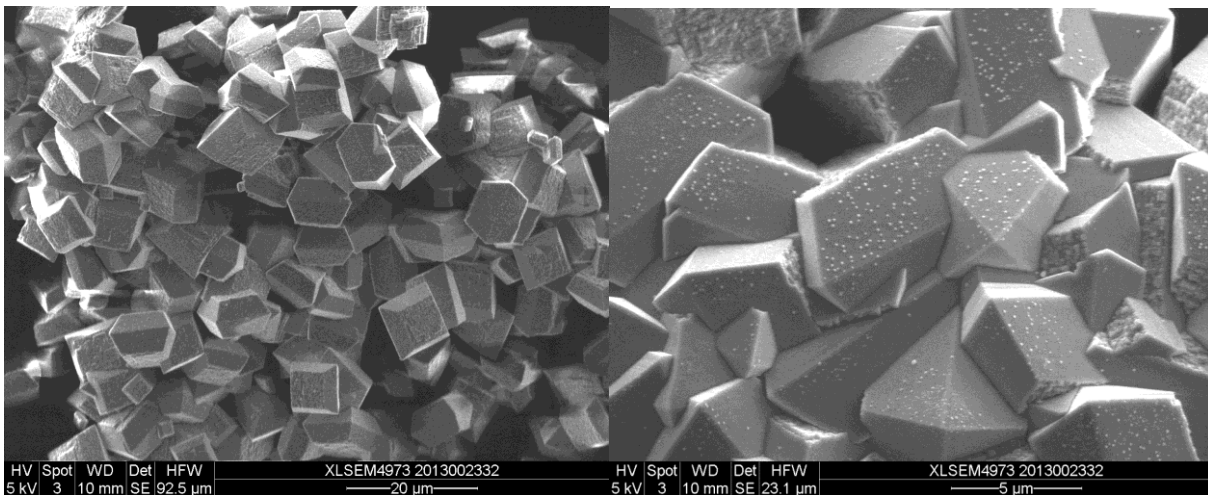

Si/Sn = 100, 7 days (Table S1, entry 26)

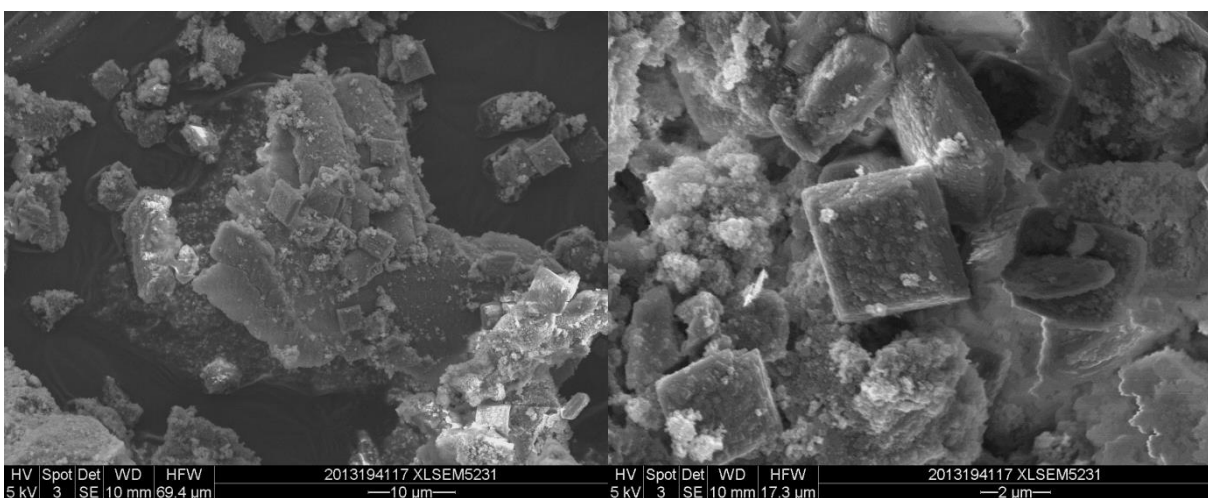

Si/Sn = 100, 14 days (Table S1, entry 27)

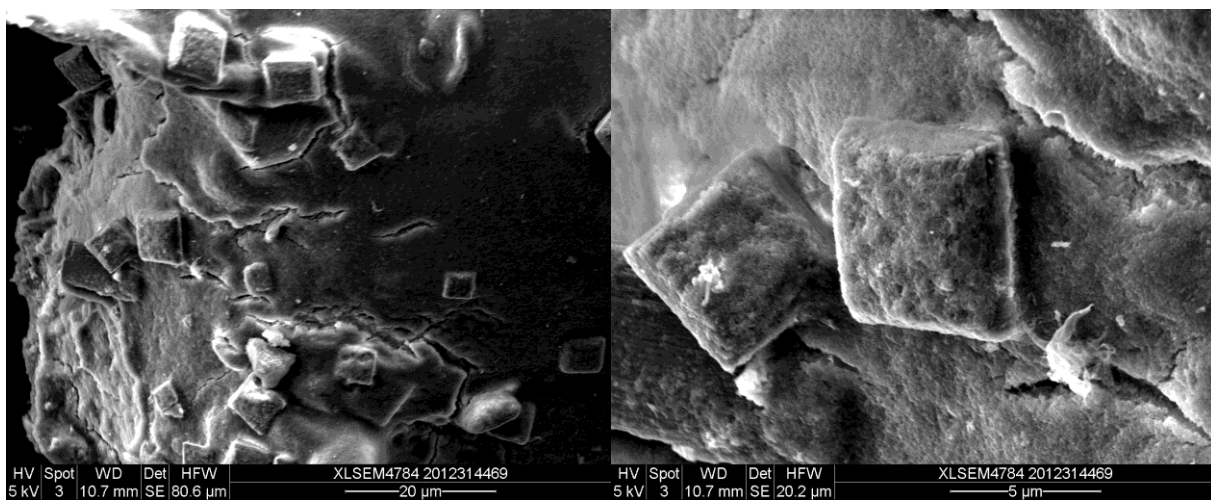

100, 30 days (Table S1, entry 28)

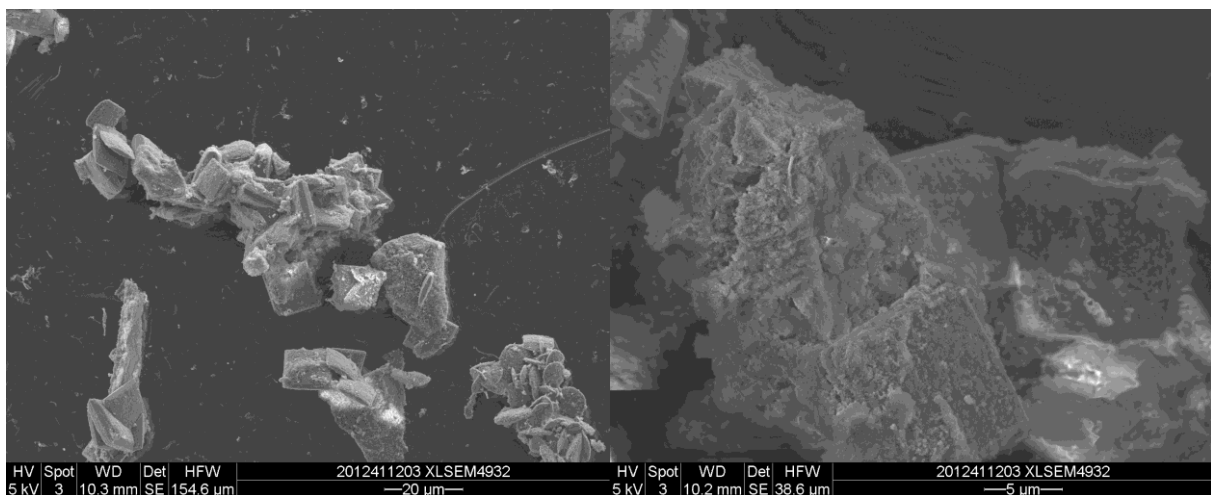

Si/Sn = 100, 60 days (Table S1, entry 29)

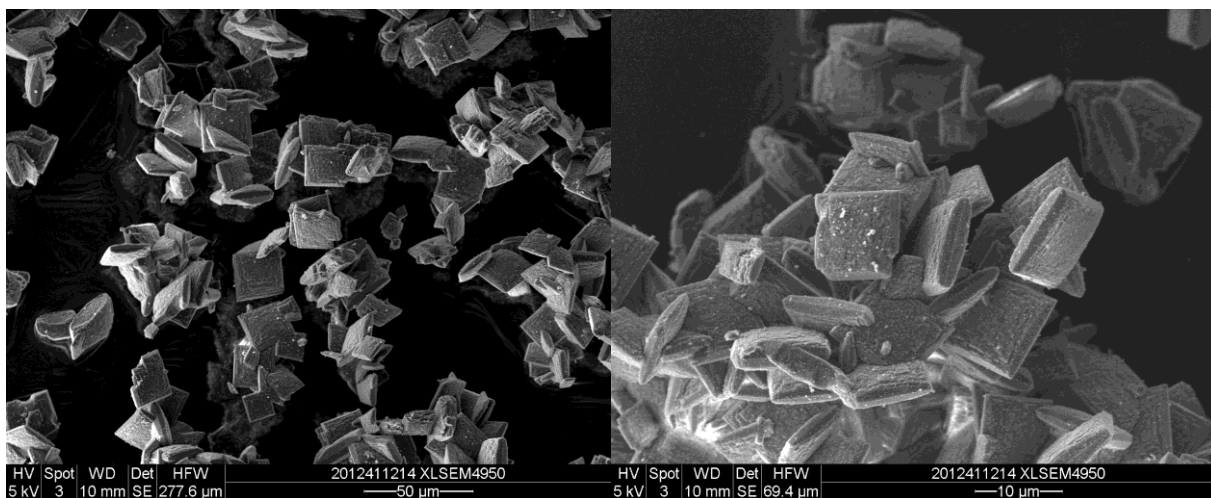

Si/Sn = 150, SnO<sub>2</sub> as tin source

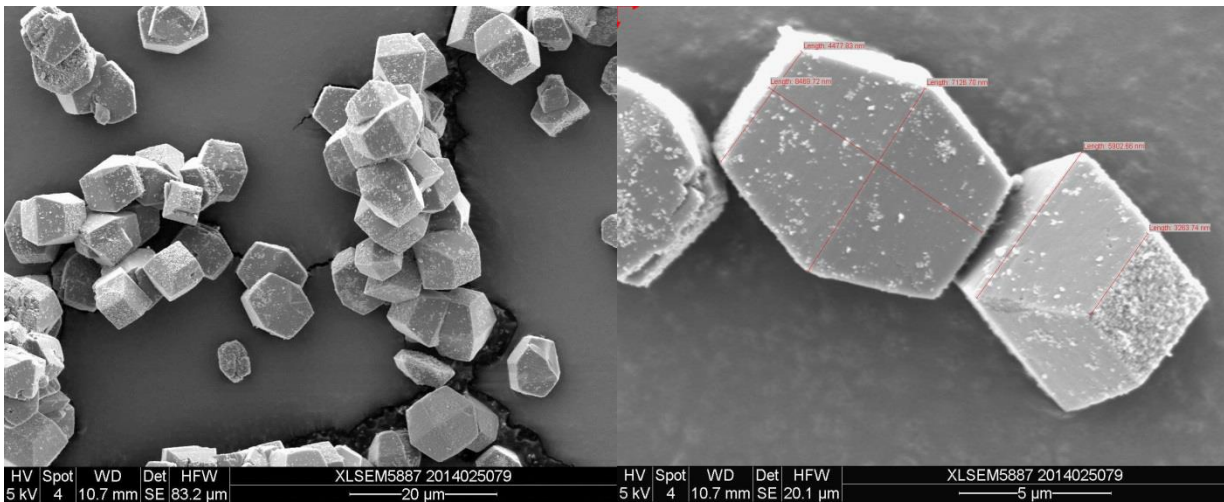

Si/Sn = 150, tin(IV)acetate as tin source

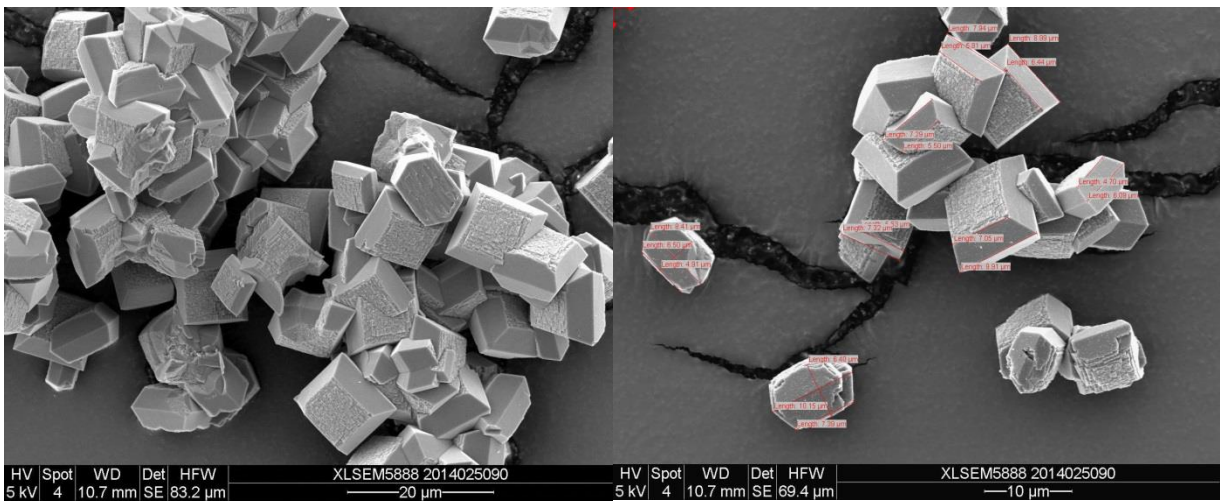

Si/Sn = 150, (TEA)<sub>2</sub>SnF<sub>6</sub> as tin source

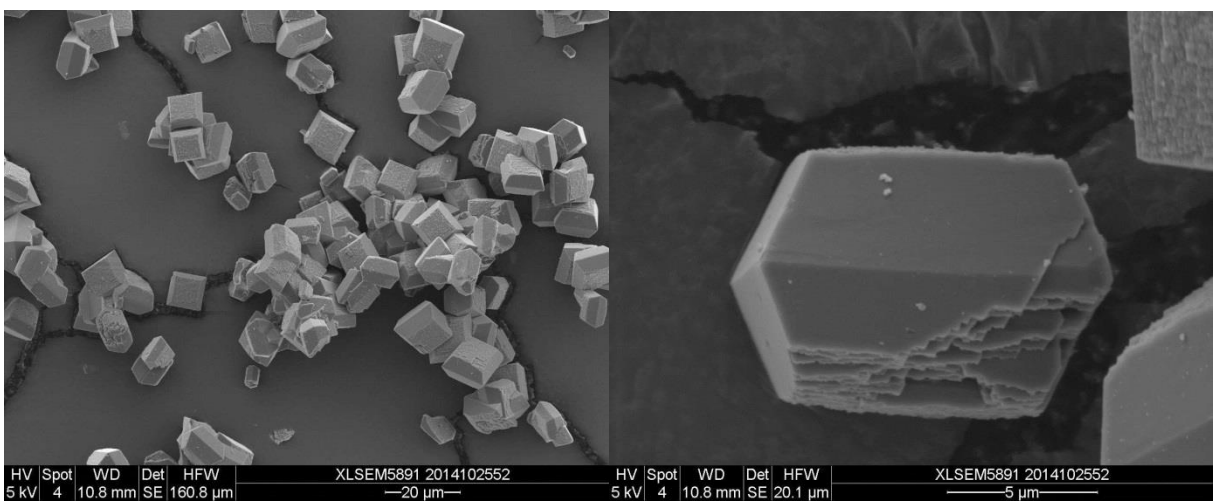

Additional SEM-EMP measurements for samples in Table S1.

Si/Sn = 400, 4 days

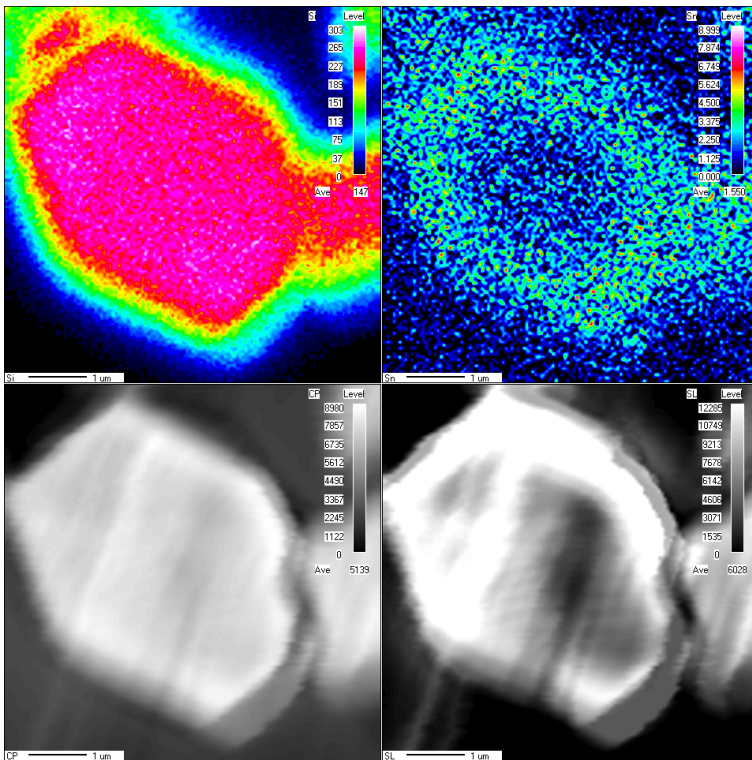

Si/Sn = 400, 14 days

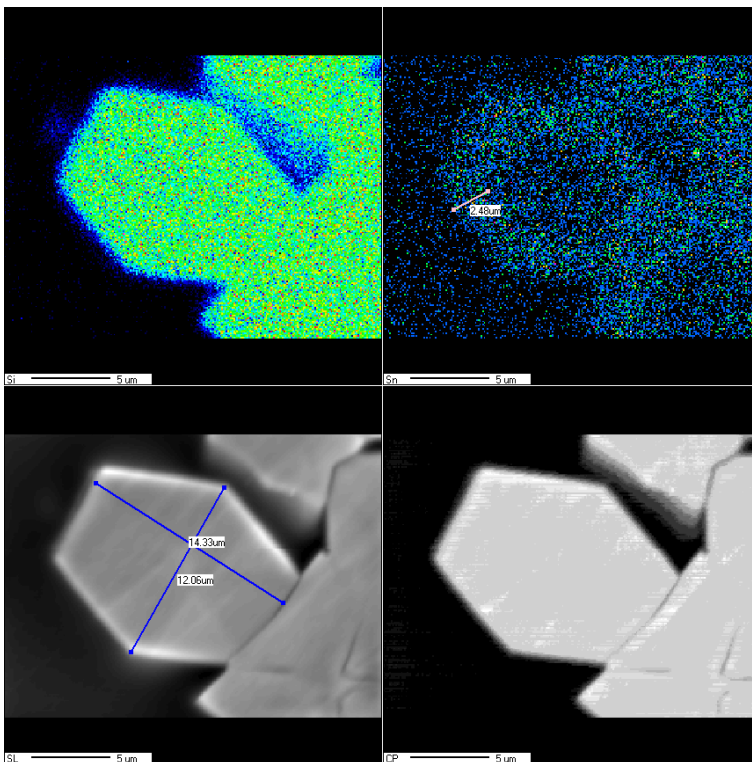

Si/Sn = 200, 4 days

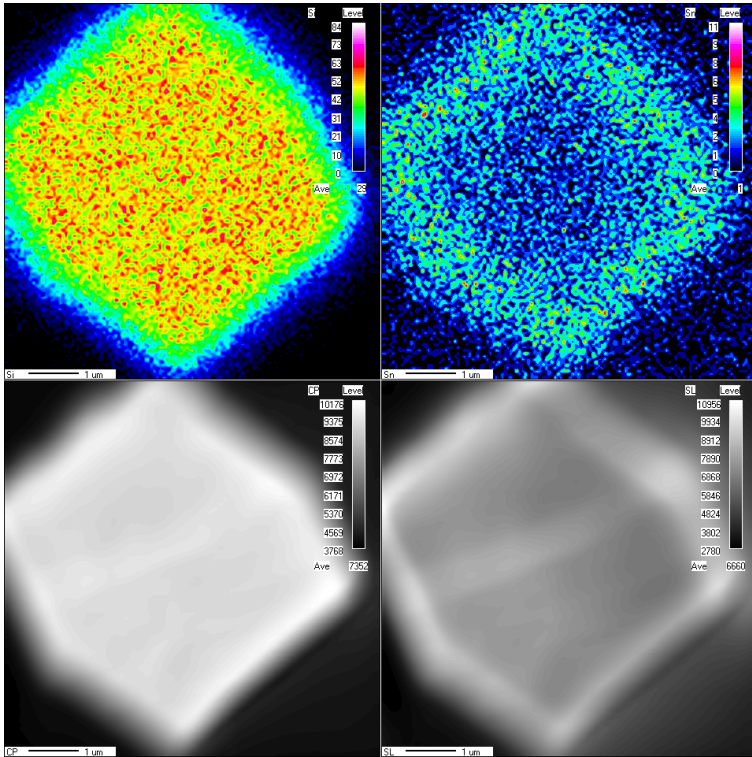

Si/Sn = 200, 7 days

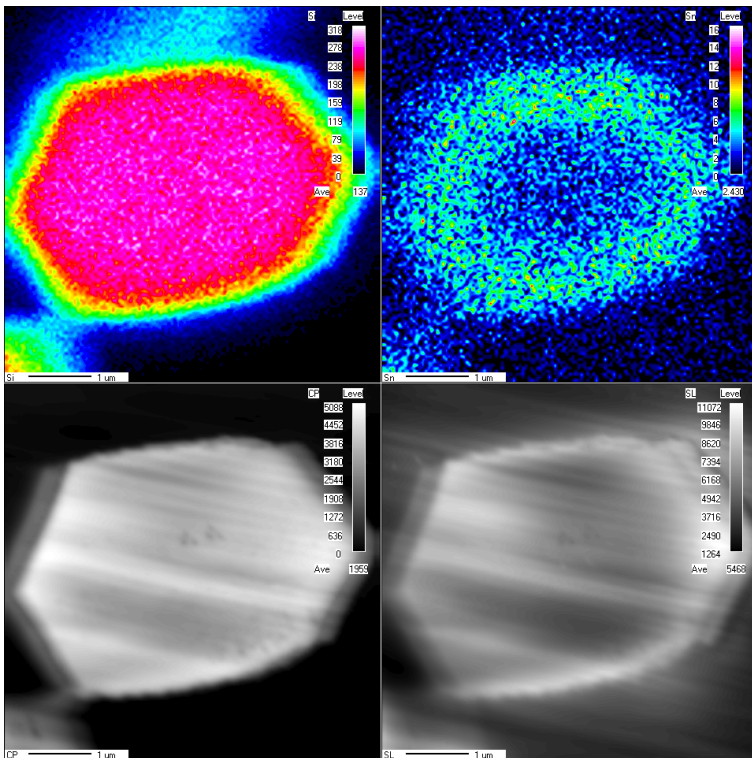



Si/Sn = 200, 14 days

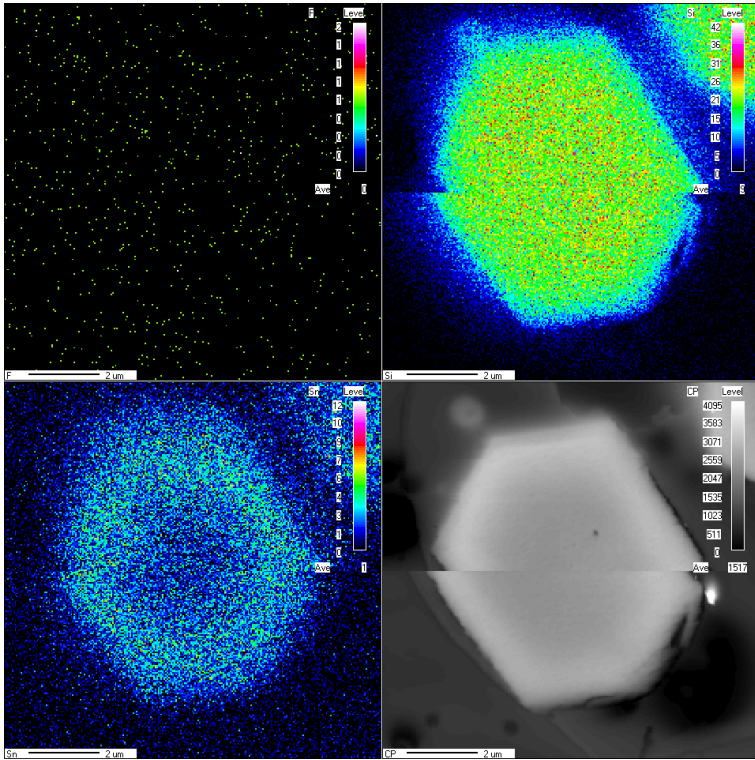

Si/Sn = 200, 30 days

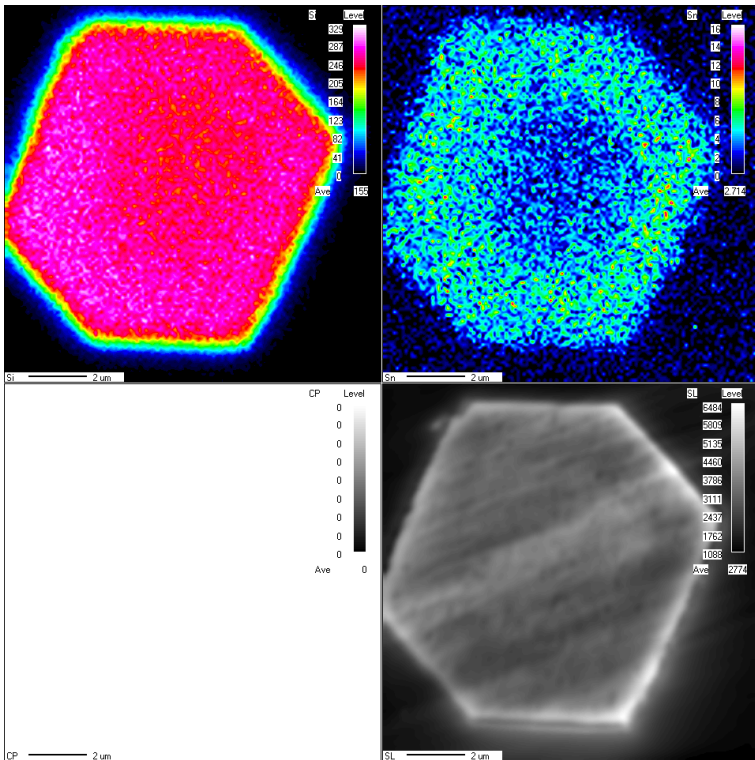

Si/Sn = 150, 14 days

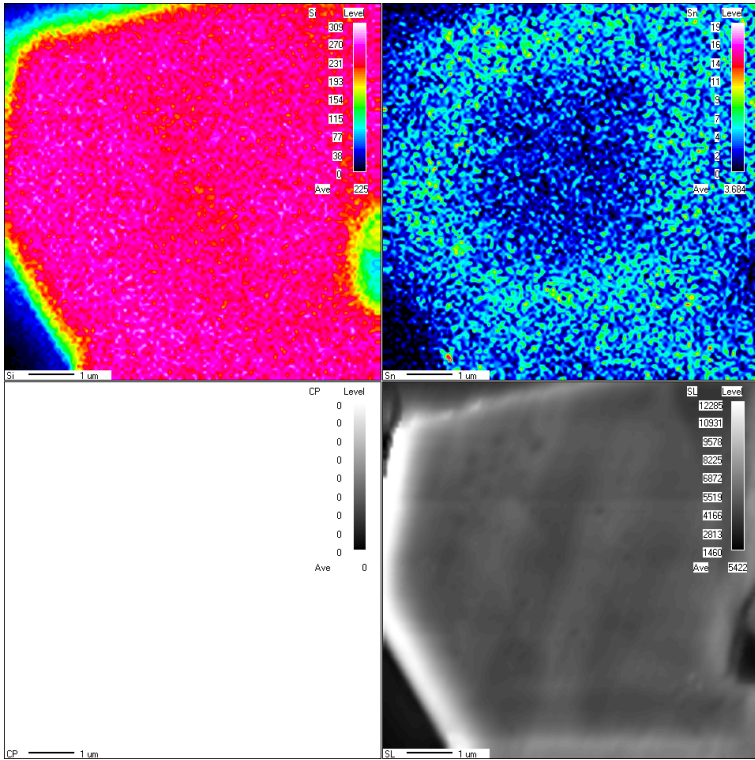

Si/Sn = 100, 60 days

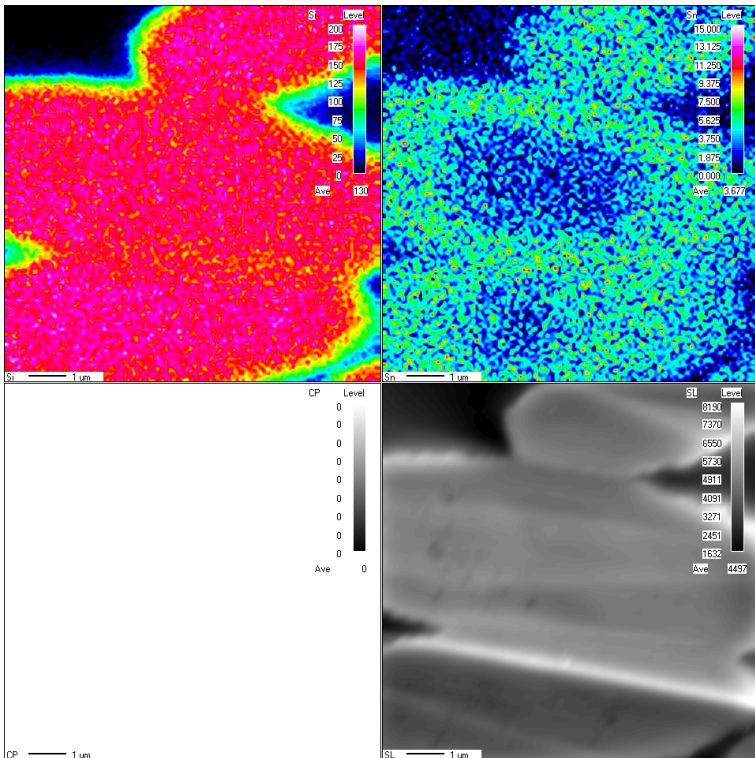

Si/Sn = 150, SnO<sub>2</sub> as tin source

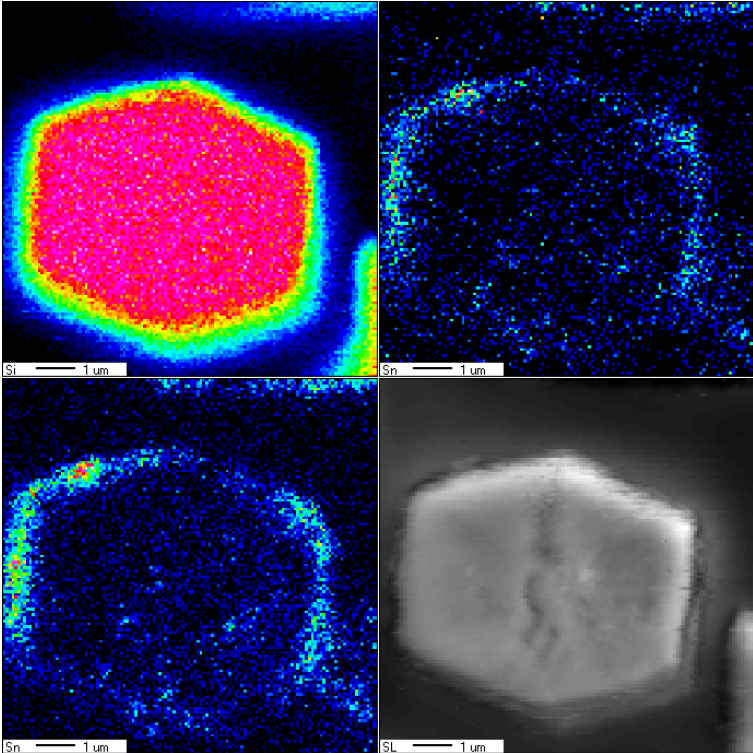

Si/Sn = 150, Tin(IV)acetate as tin source

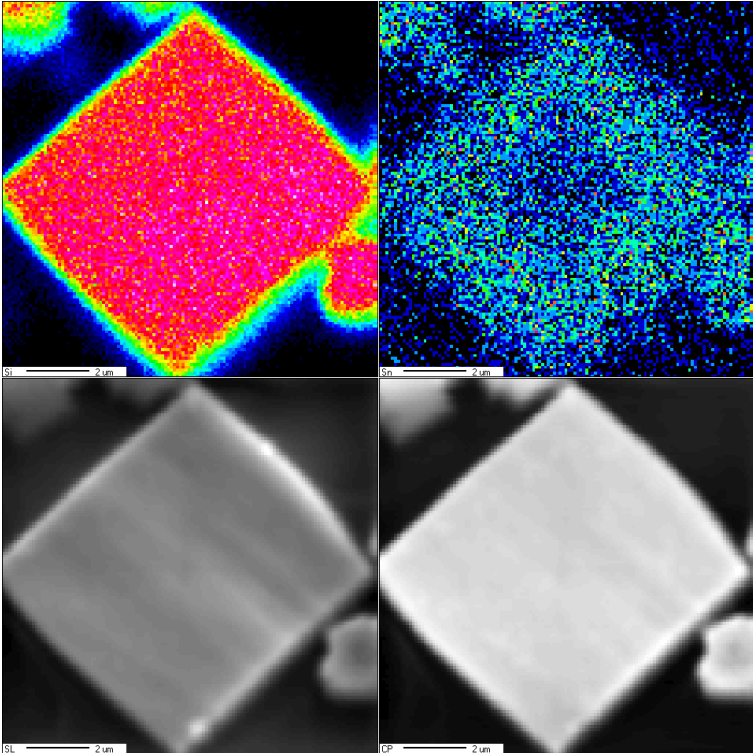

Si/Sn = 150, (TEA)<sub>2</sub>SnF<sub>6</sub> as tin source

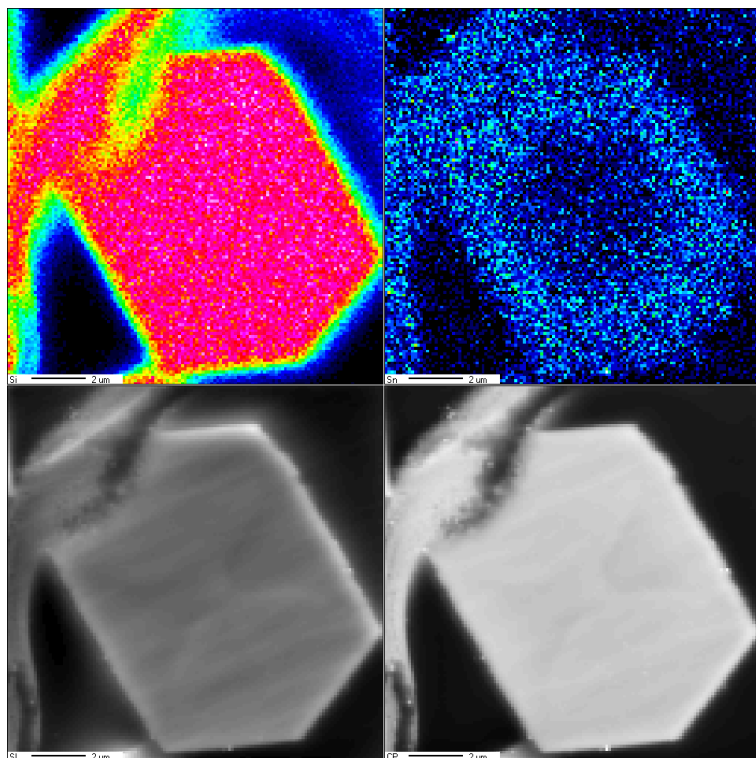

Supplement: c4ta05119j1.pdf [file c4ta05119j1.pdf]
